# Supplementary material
Source: ML conference proceedings conference paper supplement (https://openreview.net/forum?id=eNA_w8uzKW)
Supplement: supplementary_material [file attachment]

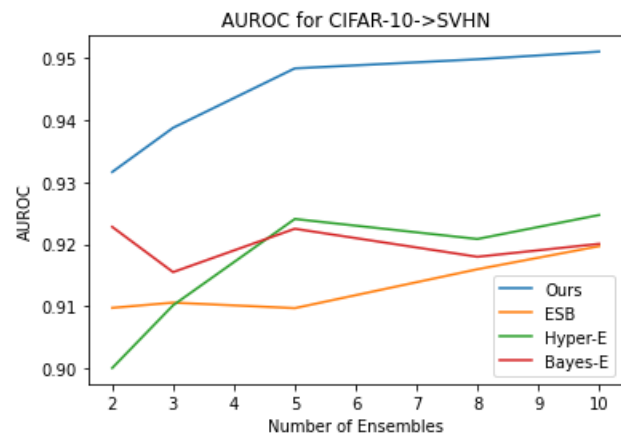

**(a) AUROC: CIFAR10→SVHN**

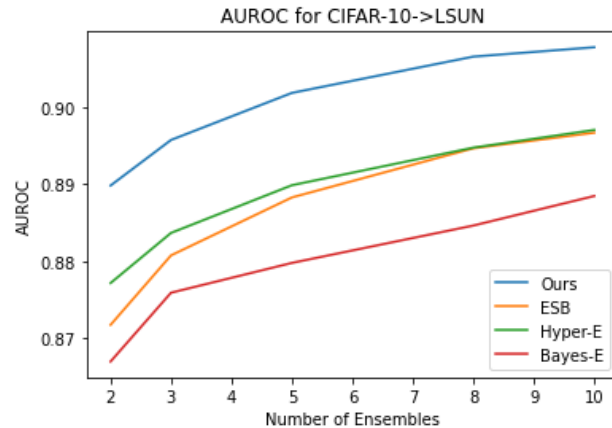

**(b) AUROC: CIFAR10→LSUN**

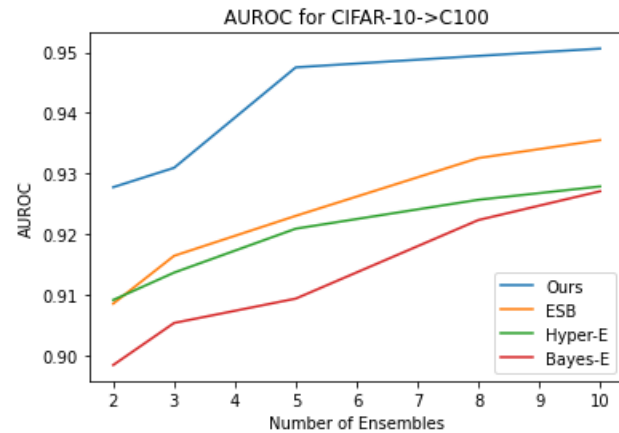

**(c) AUROC: CIFAR10→C100**

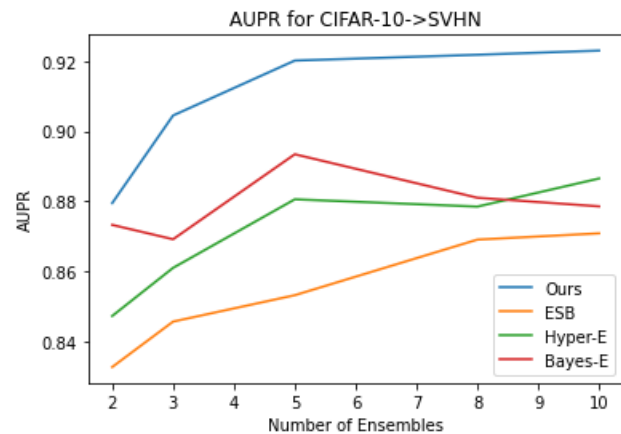

**(c) AUPR: CIFAR10→SVHN**

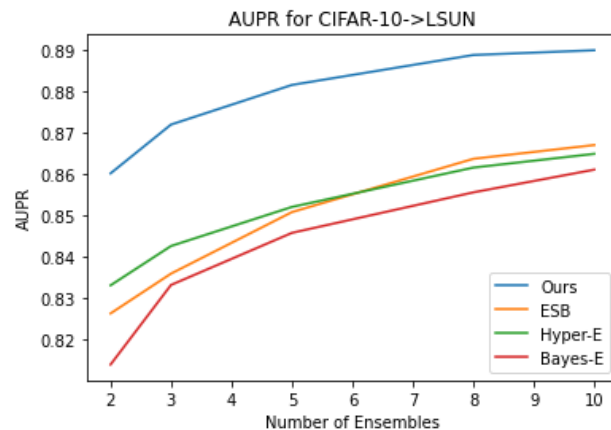

**(d) AUPR: CIFAR10→LSUN**

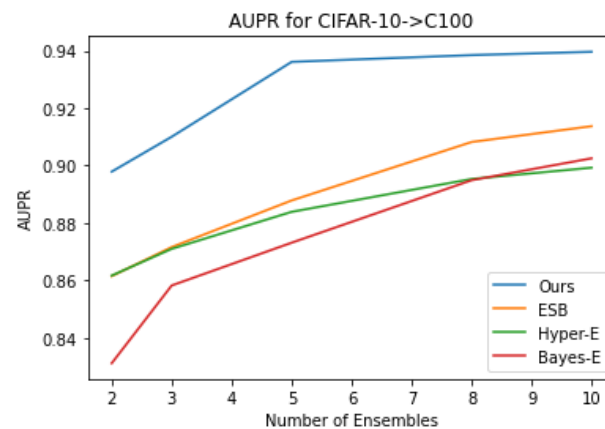

**(e) AUPR: CIFAR10→C100**
