# Supplementary material
Source: ML conference proceedings conference paper supplement (https://openreview.net/forum?id=eNA_w8uzKW)
Supplement: supplementary_material [file attachment]

ECE Under Different Rotation Angles

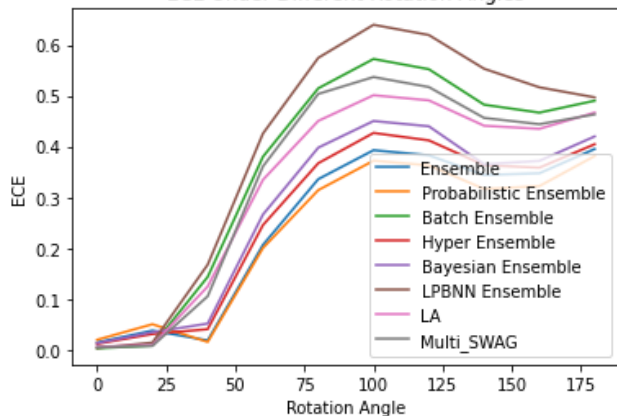

(a) ECE

Brier Score Under Different Rotation Angles

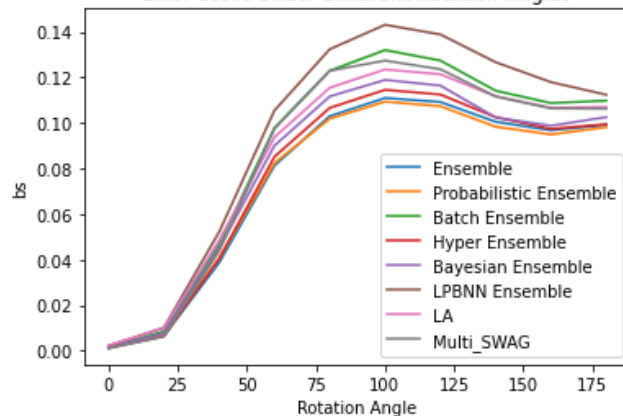

(b) Brier Score

NLL Under Different Rotation Angles

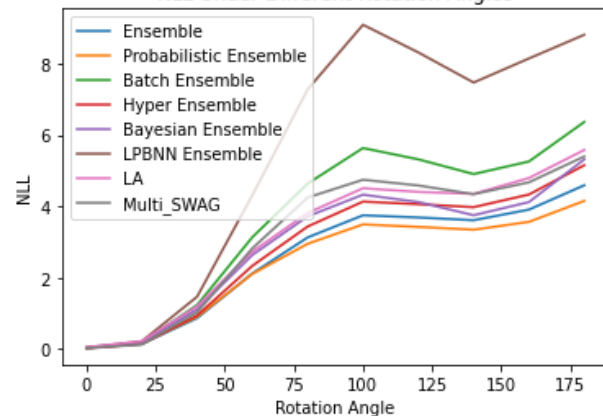

(c) NLL

ACC Under Different Noise Level

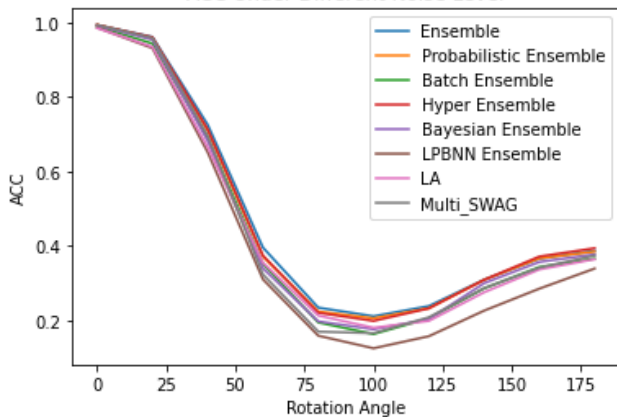

(a) ACC

AUPR Under Different Rotation Angles

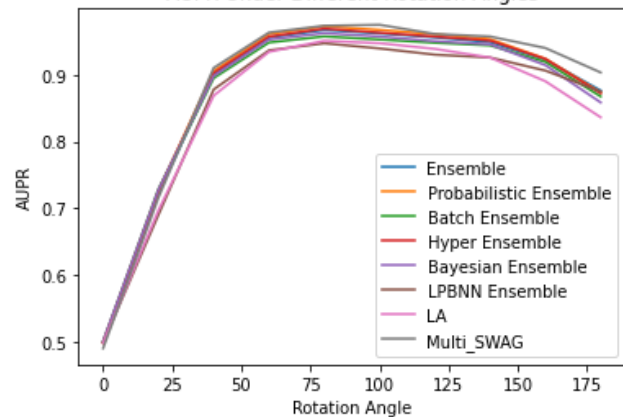

(b) AUPR

AUROC Under Different Rotation Angles

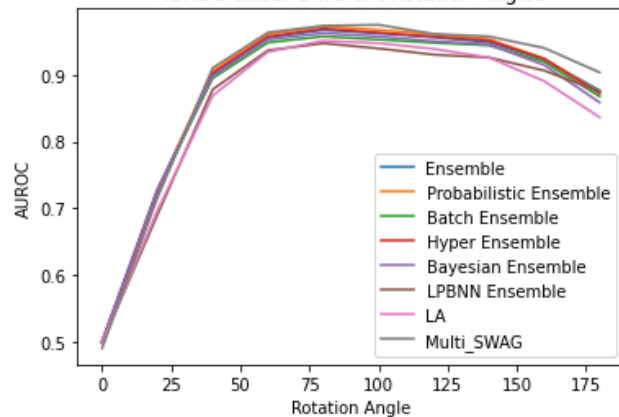

(c) AUROC
