# Supplementary material
Source: ML conference proceedings conference paper supplement (https://openreview.net/forum?id=eNA_w8uzKW)
Supplement: supplementary_material [file attachment]

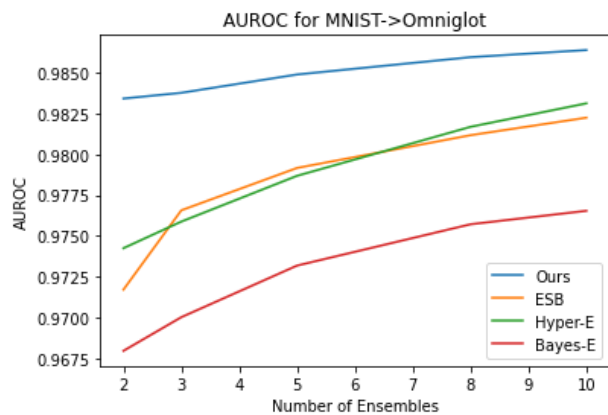

**(a) AUROC: MNIST→Omniglot**

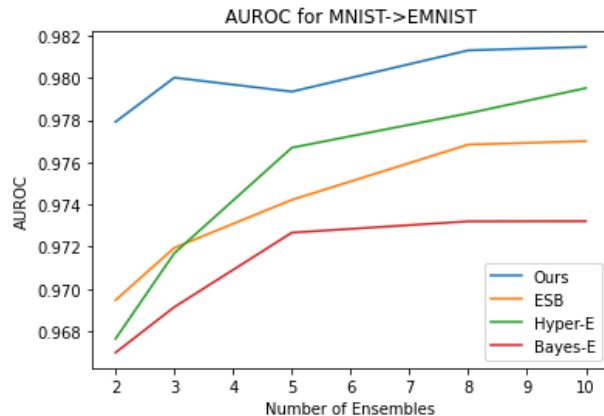

**(b) AUROC: MNIST→EMNIST**

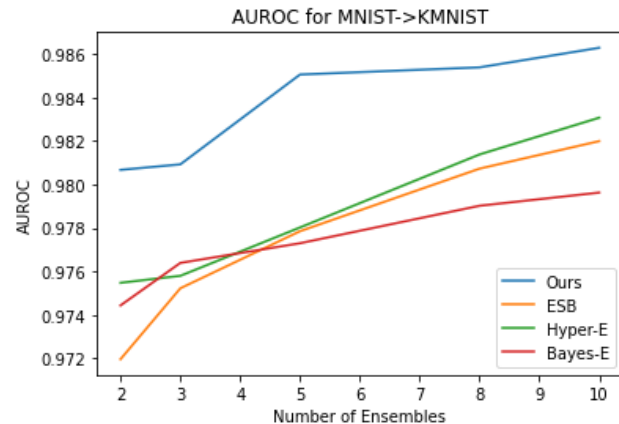

**(c) AUROC: MNIST→KMNIST**

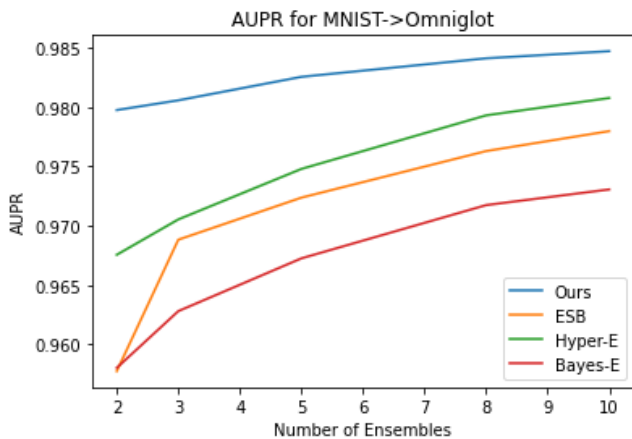

**(c) AUPR: MNIST→Omniglot**

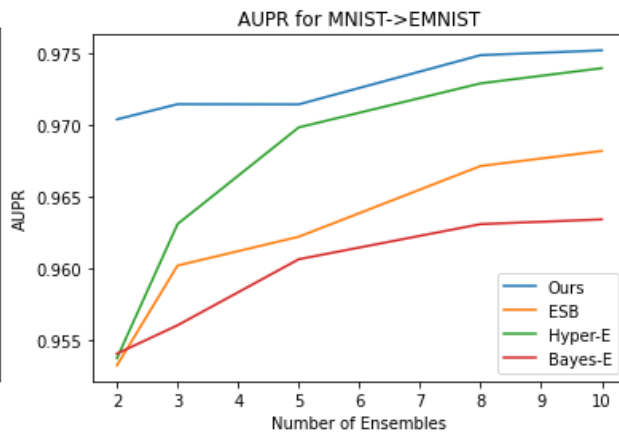

**(d) AUPR: MNIST→EMNIST**

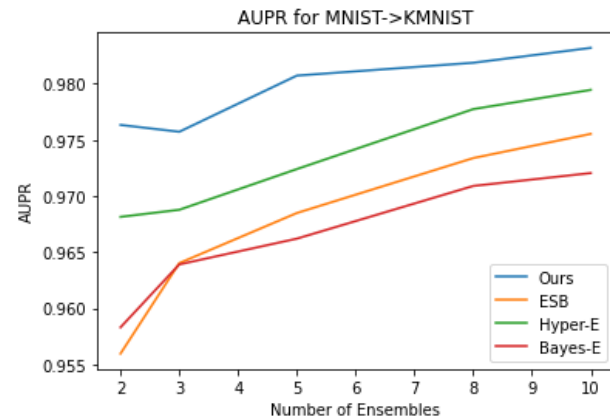

**(e) AUPR: MNIST→KMNIST**
