# Supplementary material
Source: ML conference proceedings conference paper supplement (https://openreview.net/forum?id=eNA_w8uzKW)

The Pool of  
Previous  
Models

Establish the  
Probabilistic  
Ensemble  
Model

**Add back**

Train A New  
Model  
Guided by  
Uncertainty

**weights**

Uncertainty  
Estimation

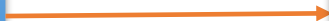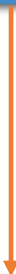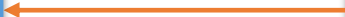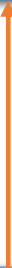

Supplement: supplementary_material [file attachment]
