# Supplementary material
Source: ML conference proceedings conference paper supplement (https://openreview.net/forum?id=eNA_w8uzKW)

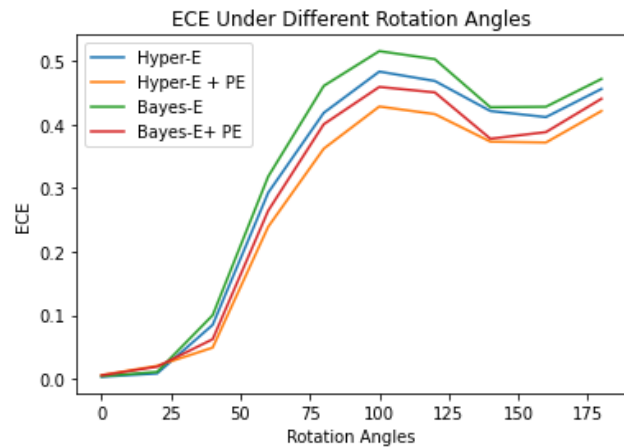

(a) ECE

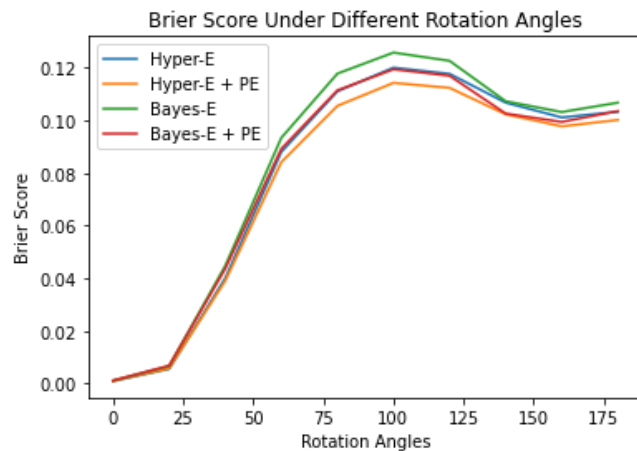

(b) Brier Score

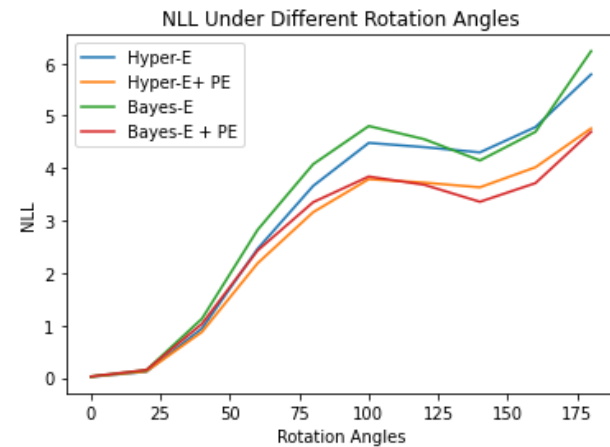

(c) NLL

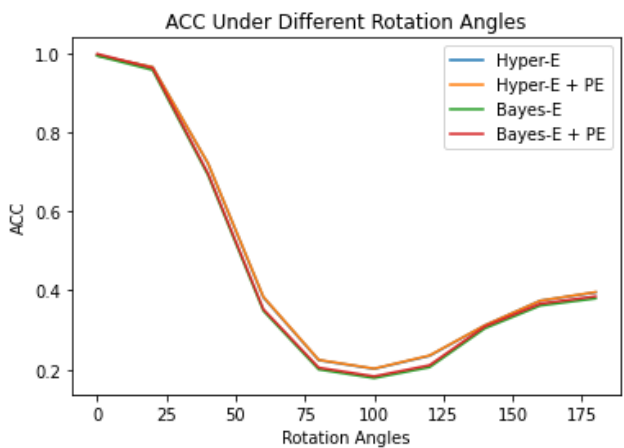

(d) ACC

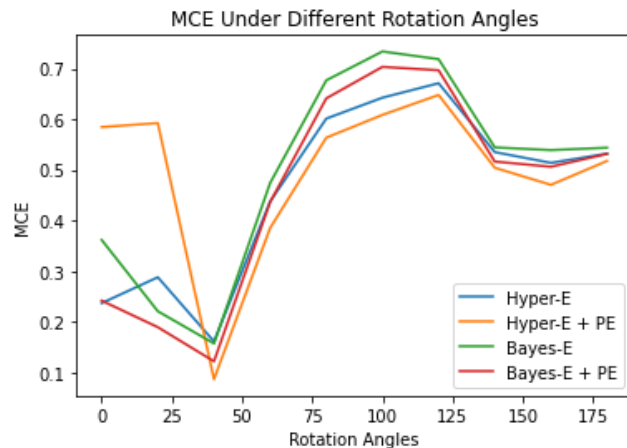

(e) MCE

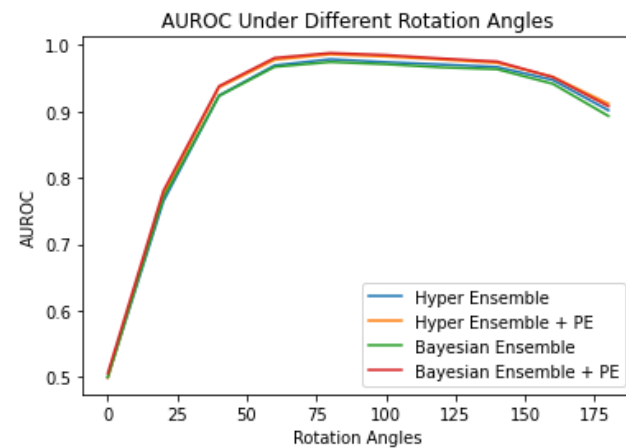

(f) AUROC

Supplement: supplementary_material [file attachment]

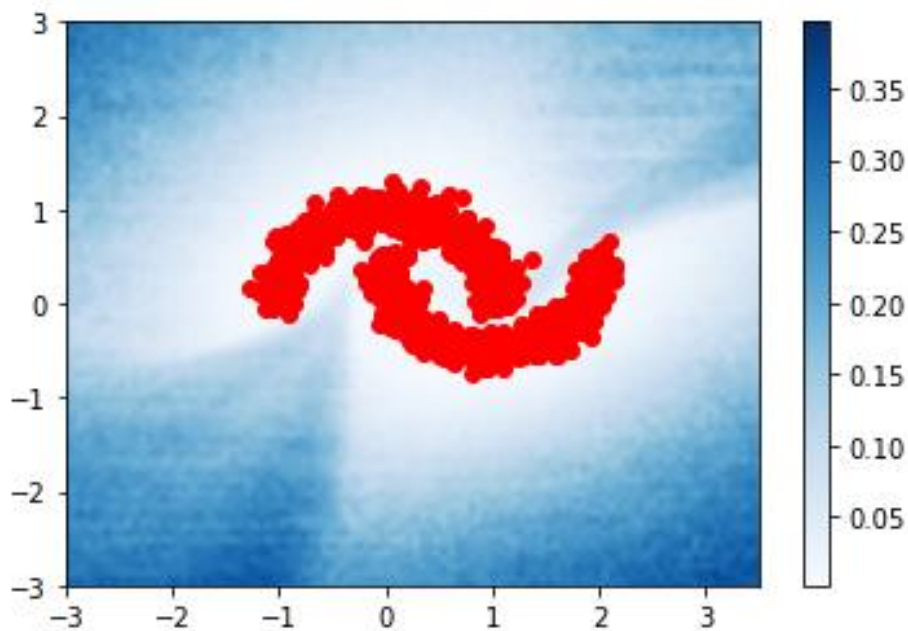

Supplement: supplementary_material [file attachment]

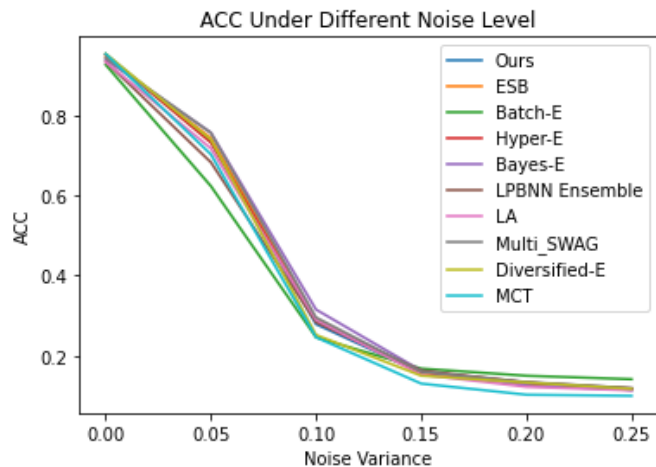

(a) ACC

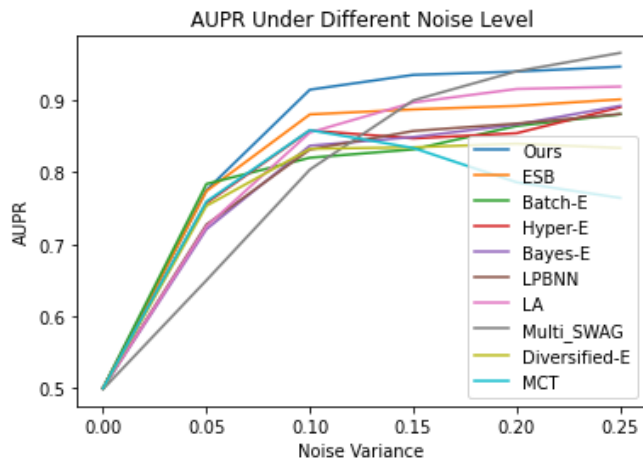

(b) AUPR

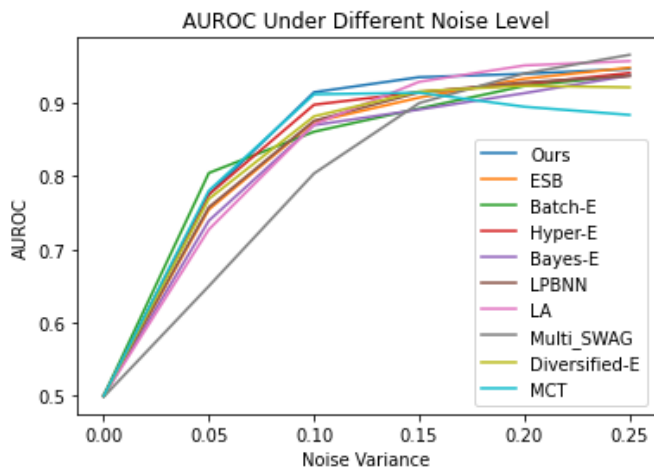

(c) AUROC

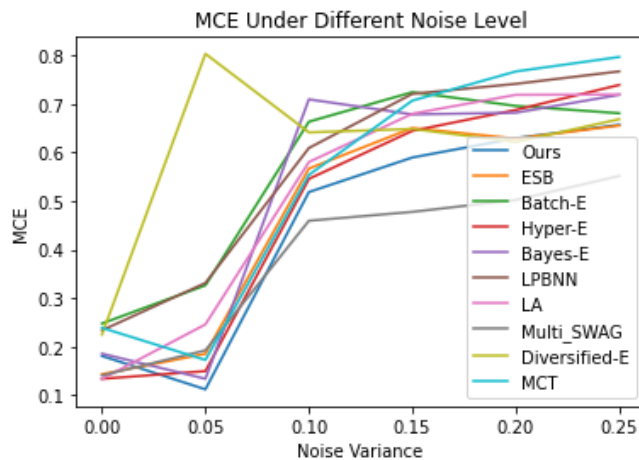

(d) MCE

Supplement: supplementary_material [file attachment]

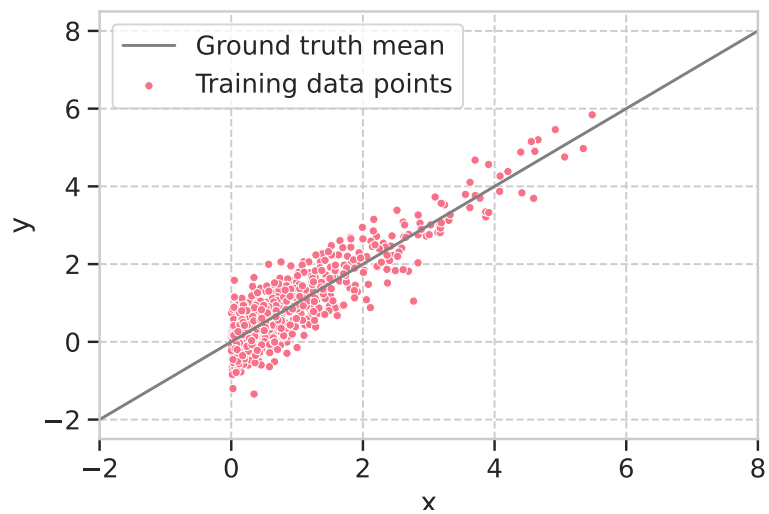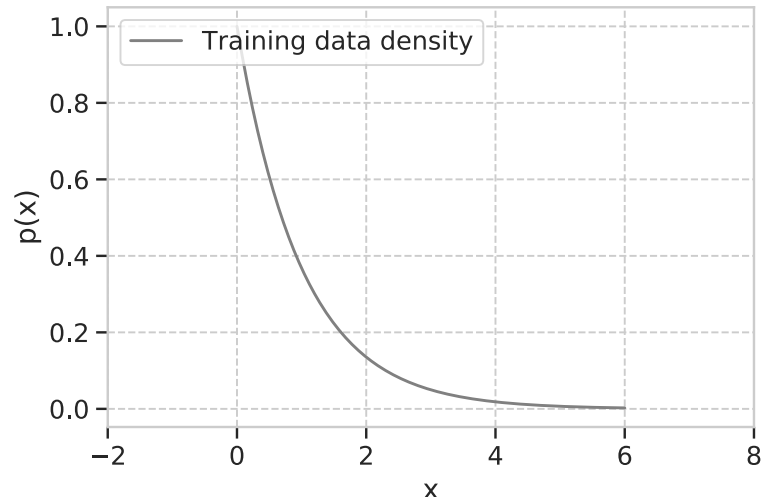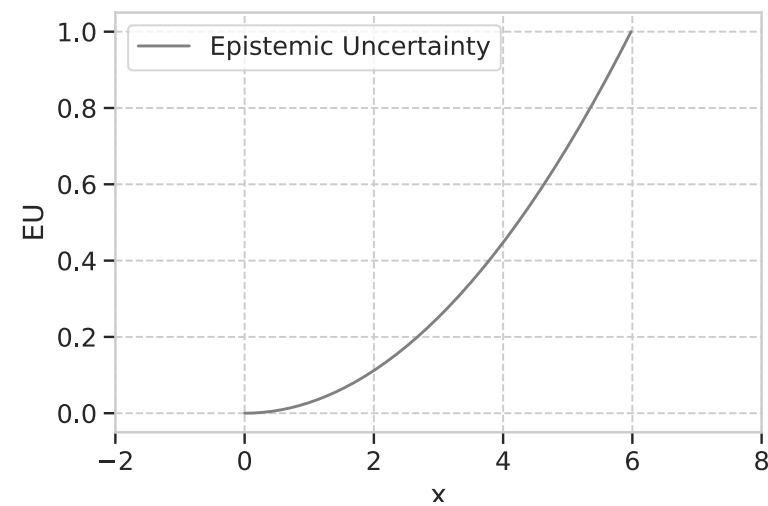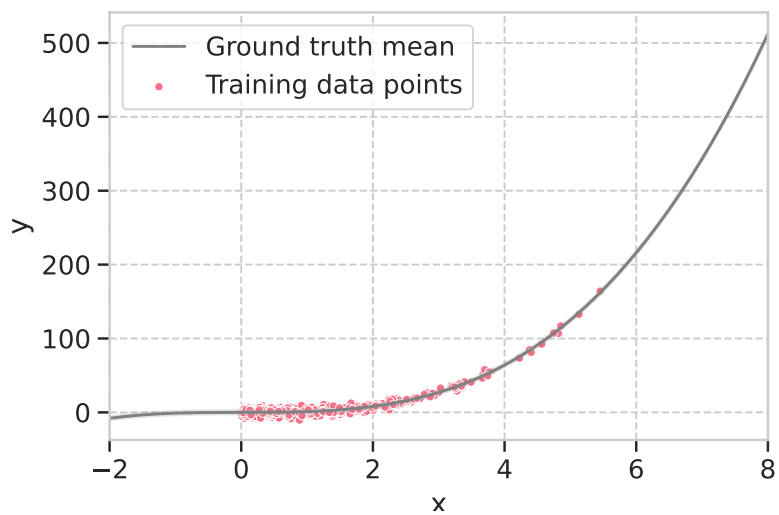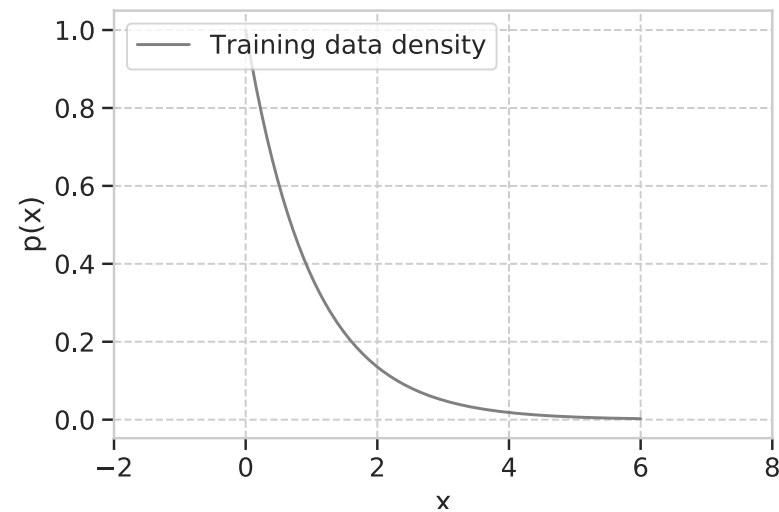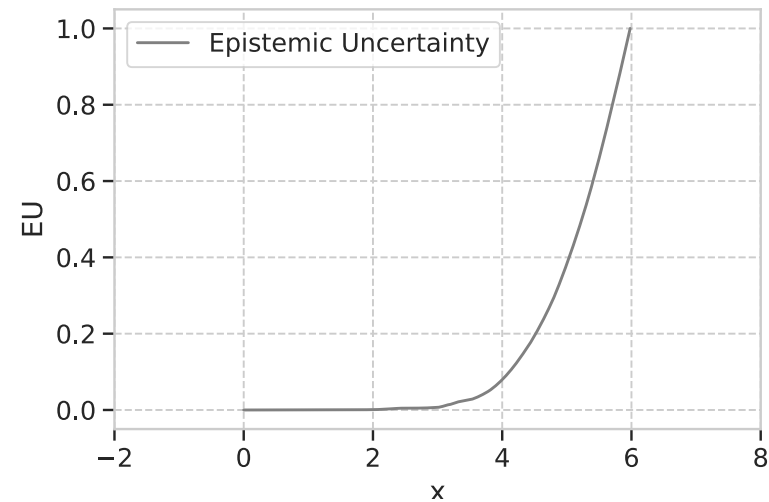

Supplement: supplementary_material [file attachment]

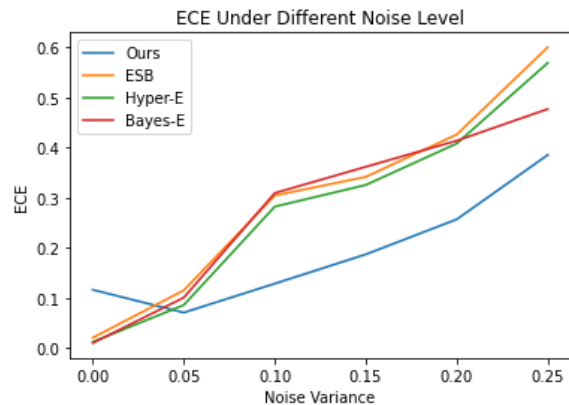

(a) ECE

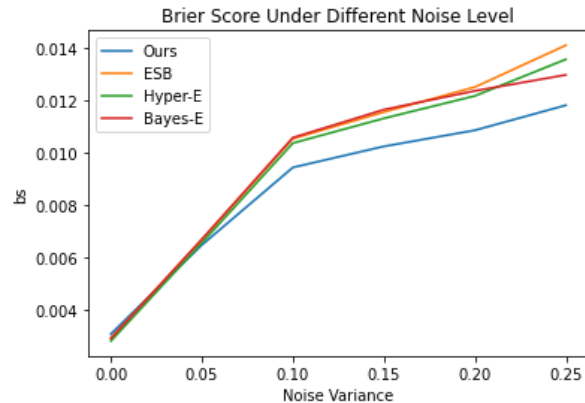

(b) Brier Score

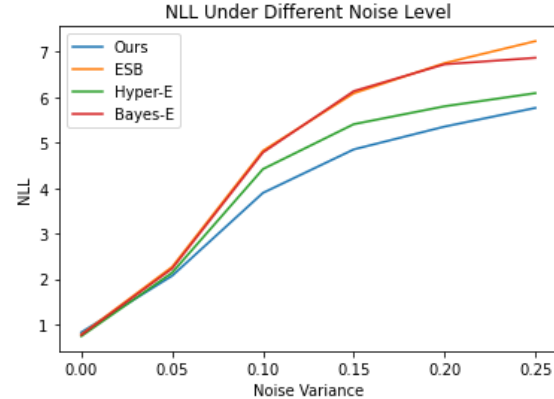

(c) NLL

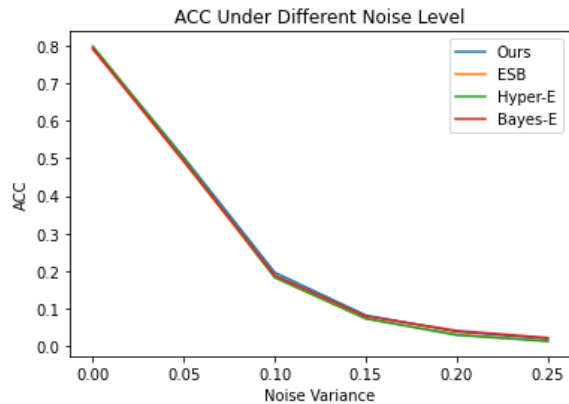

(d) ACC

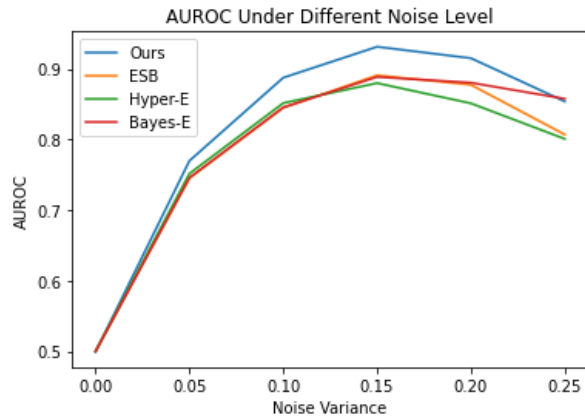

(e) AUROC

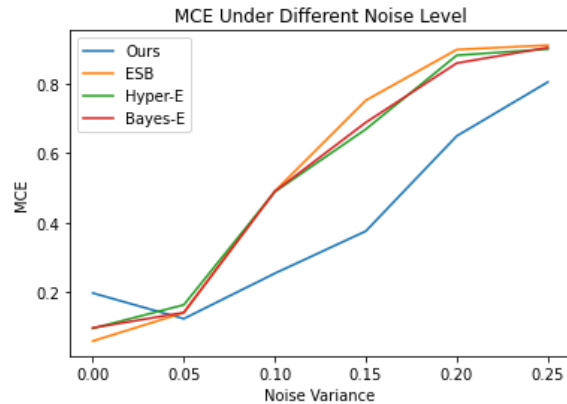

(f) MCE

Supplement: supplementary_material [file attachment]

## Prediction Space Diversity

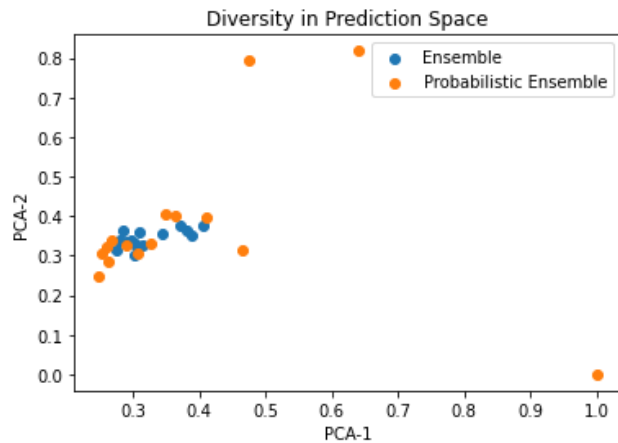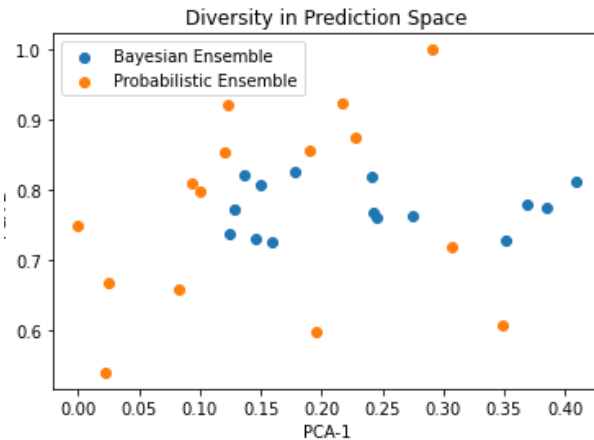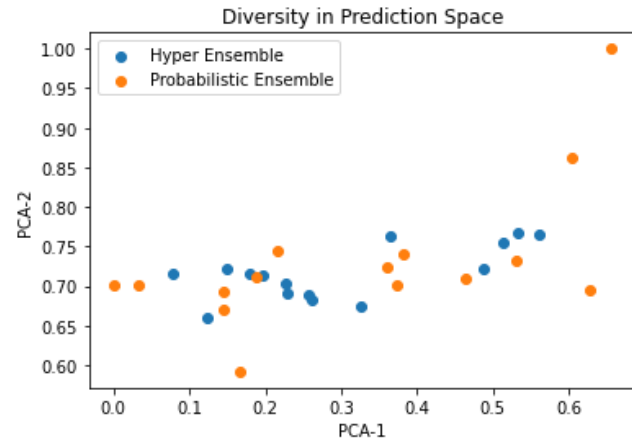

## Parameter Space Diversity

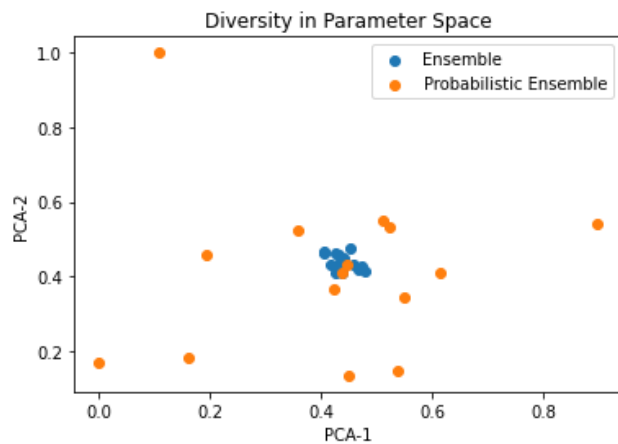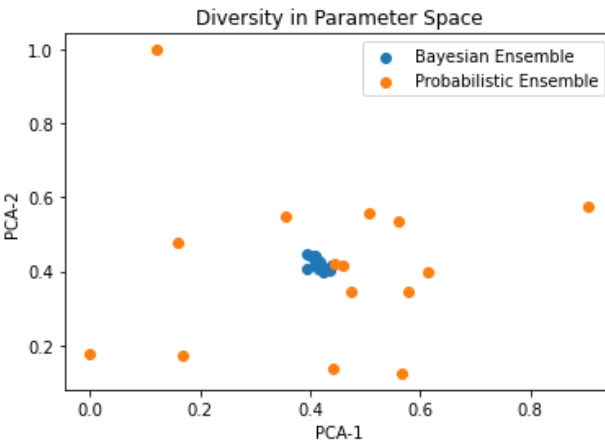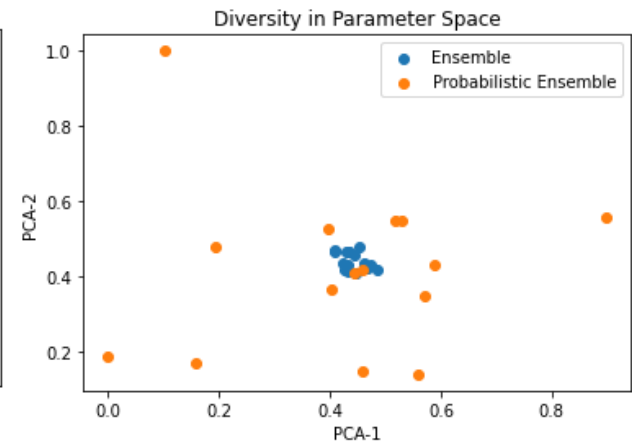

(a) PE vs ESB

(b) PE vs Bayes-E

(c) PE vs Hyper-E

Supplement: supplementary_material [file attachment]

## Rotated MNIST

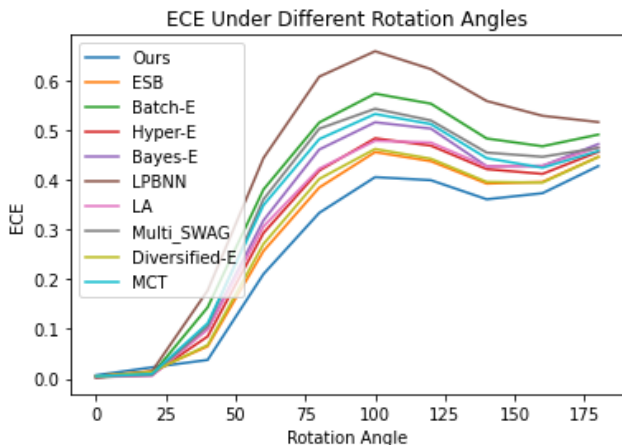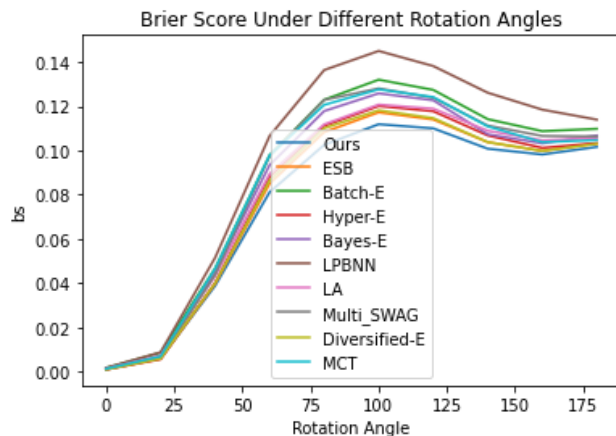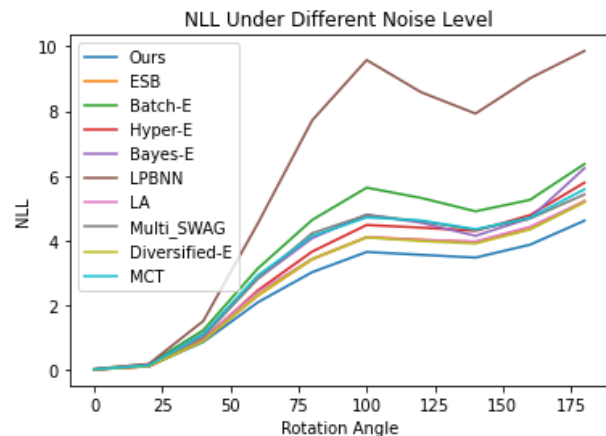

## Corrupted CIFAR-10

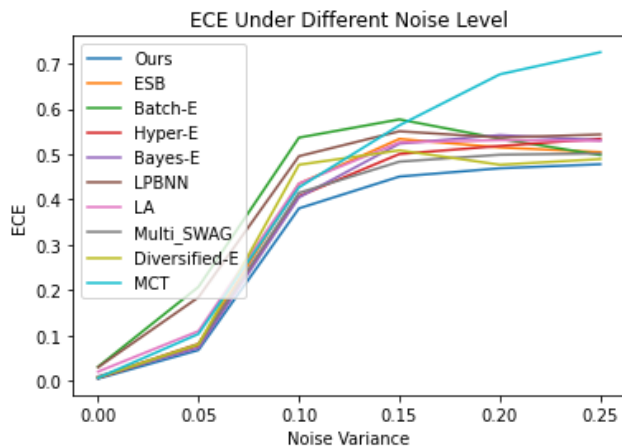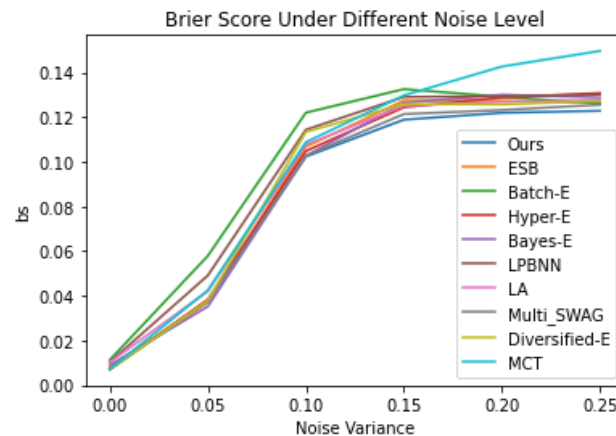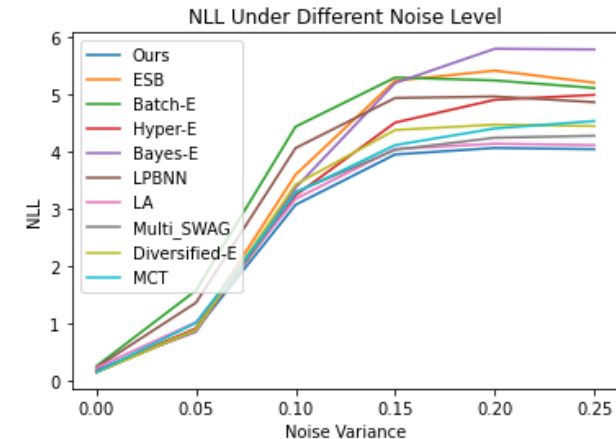

(a) ECE

(b) Brier Score

(c) NLL

Supplement: supplementary_material [file attachment]

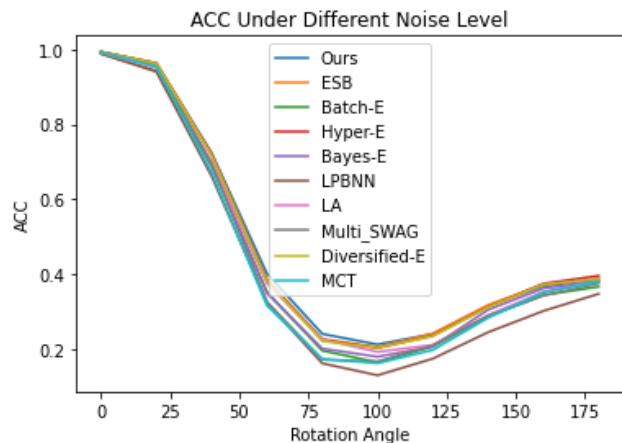

(a) ACC

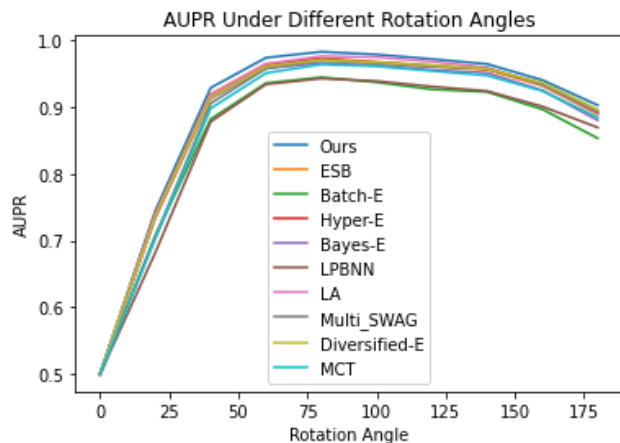

(b) AUPR

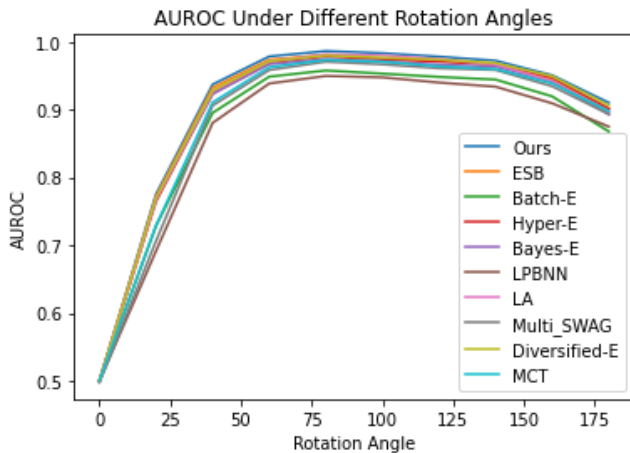

(c) AUROC

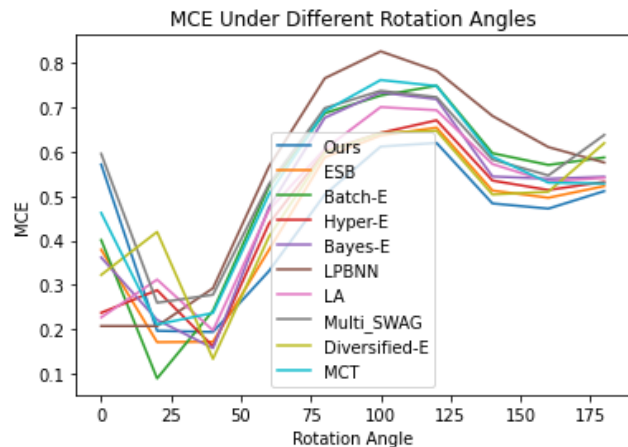

(d) MCE

Supplement: supplementary_material [file attachment]

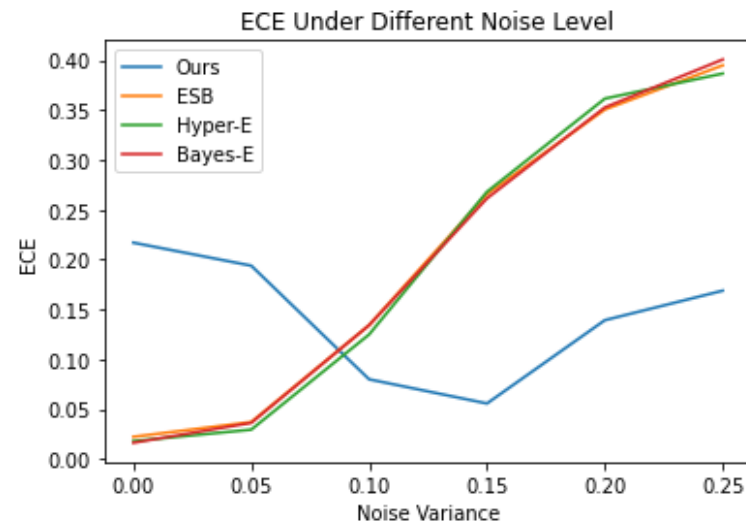

(a) ECE

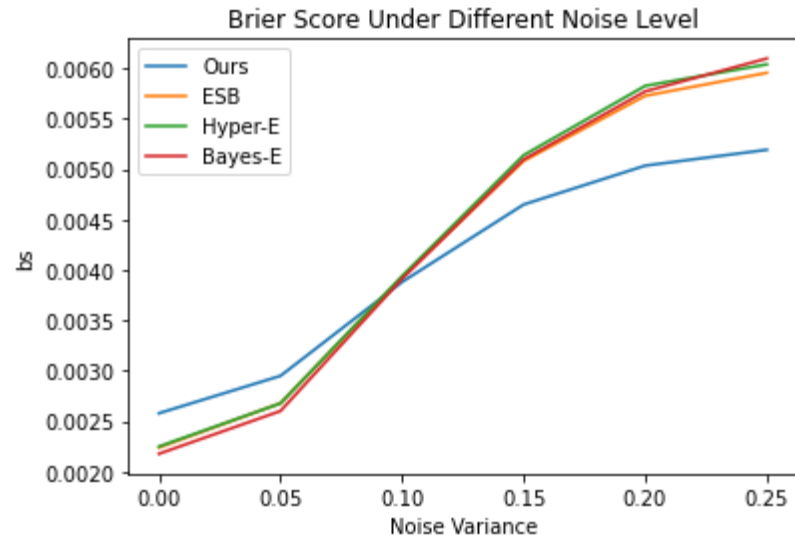

(b) Brier Score

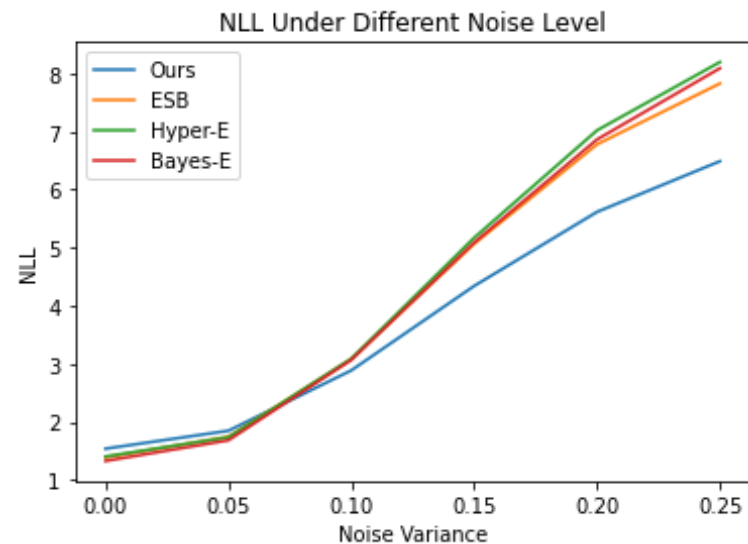

(c) NLL

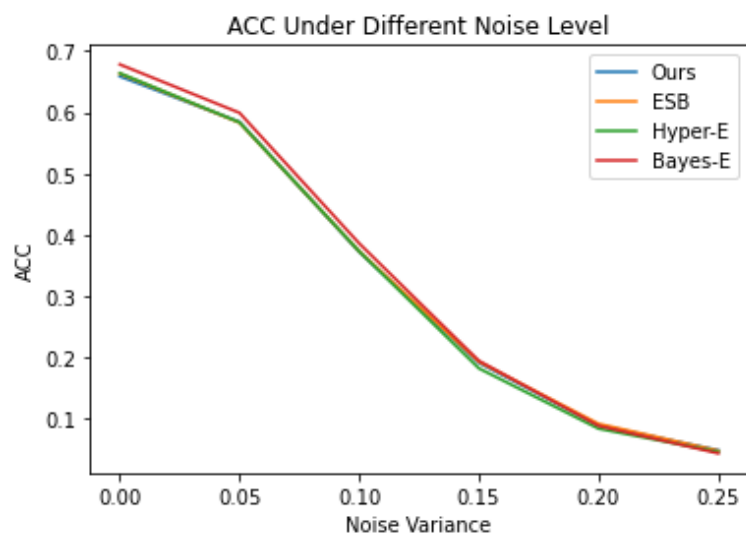

(d) ACC

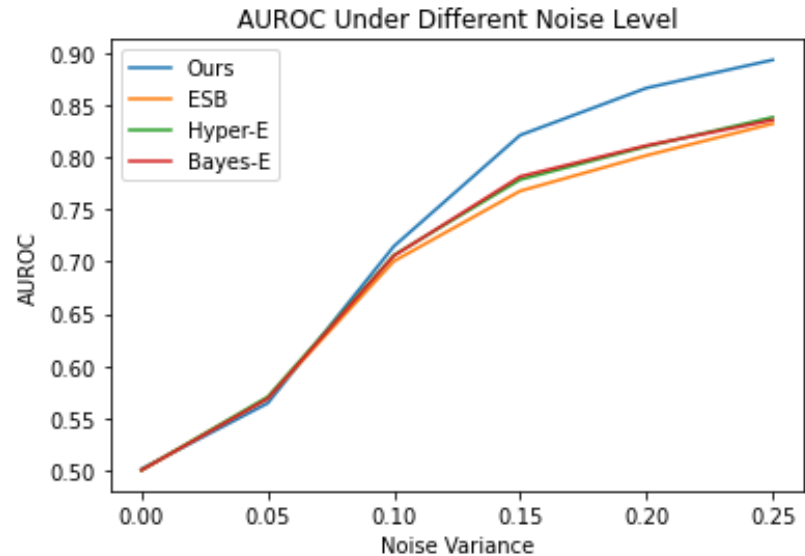

(e) AUROC

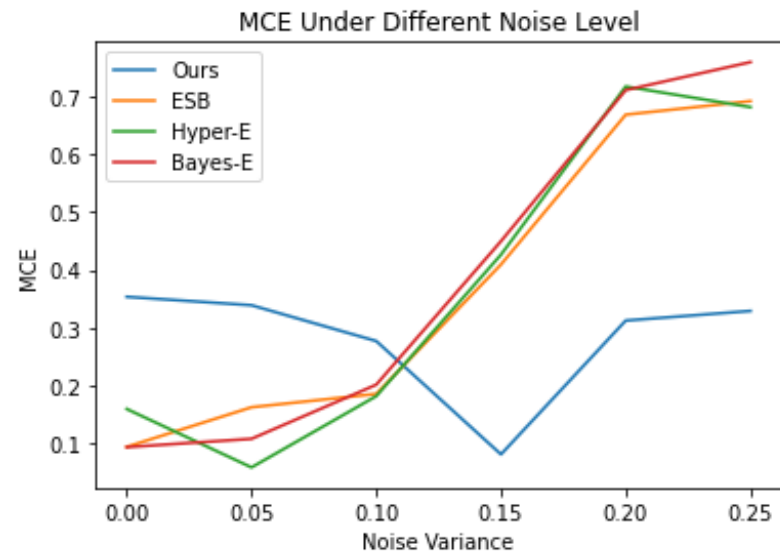

(f) MCE

Supplement: supplementary_material [file attachment]

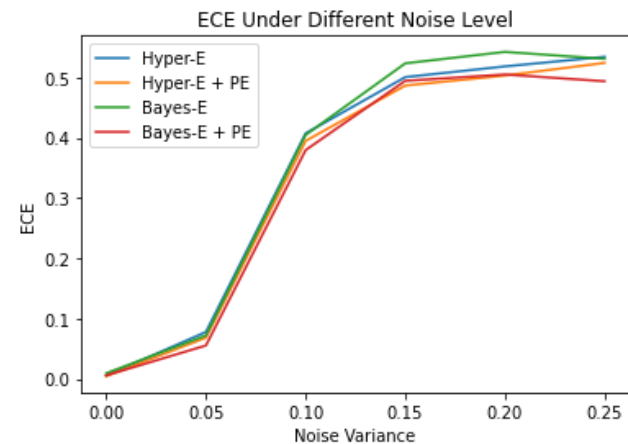

**(a) ECE**

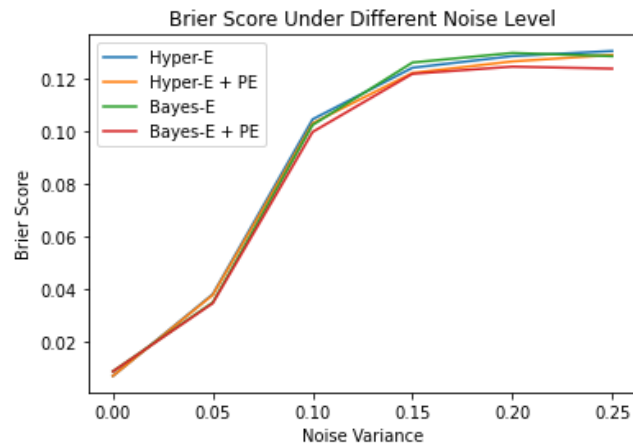

**(b) Brier Score**

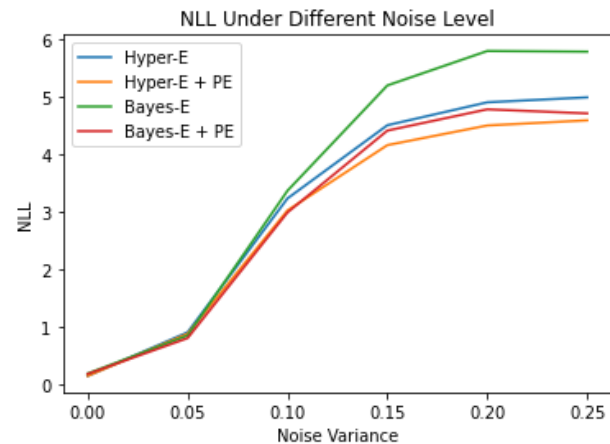

**(c) NLL**

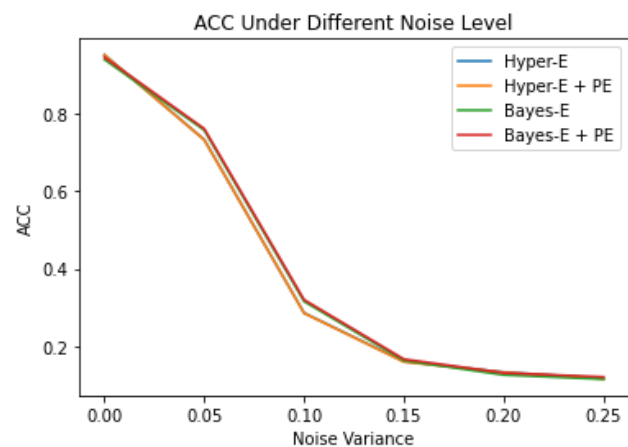

**(d) ACC**

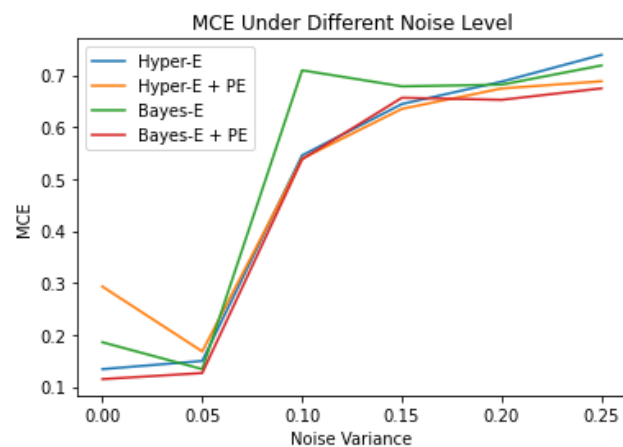

**(e) MCE**

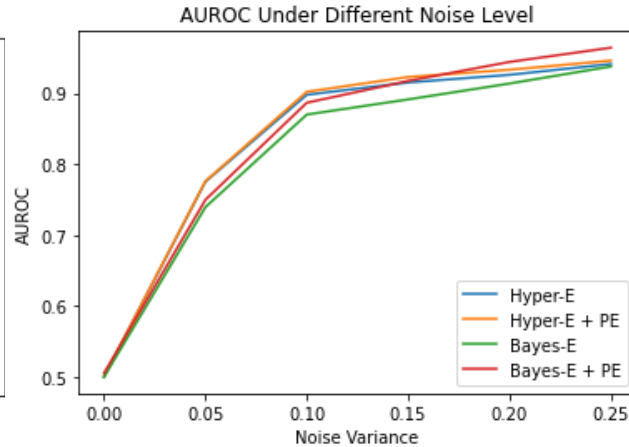

**(f) AUROC**

Supplement: supplementary_material [file attachment]

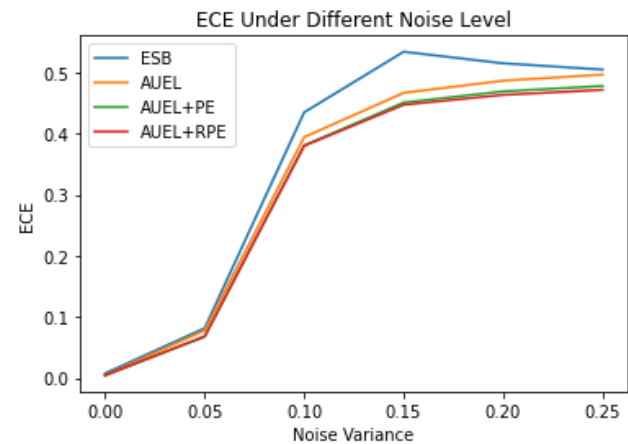

(a) ECE

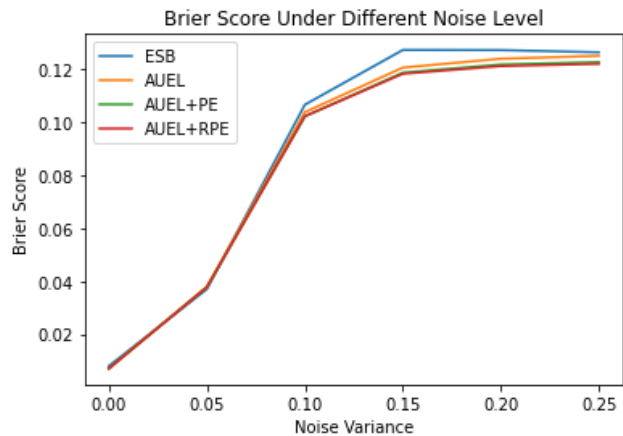

(b) Brier Score

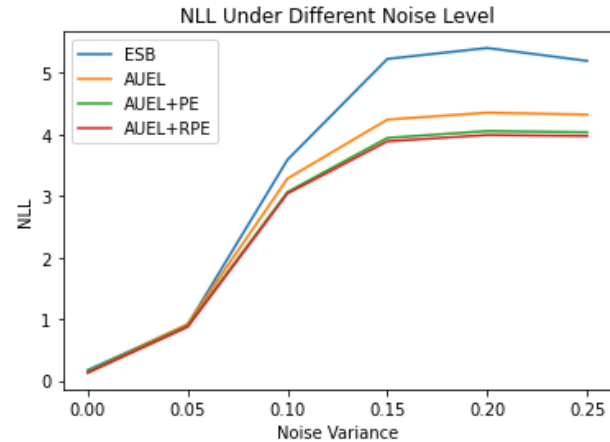

(c) NLL

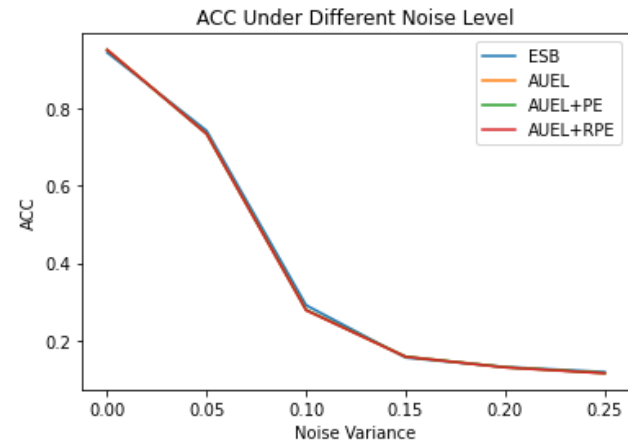

(d) ACC

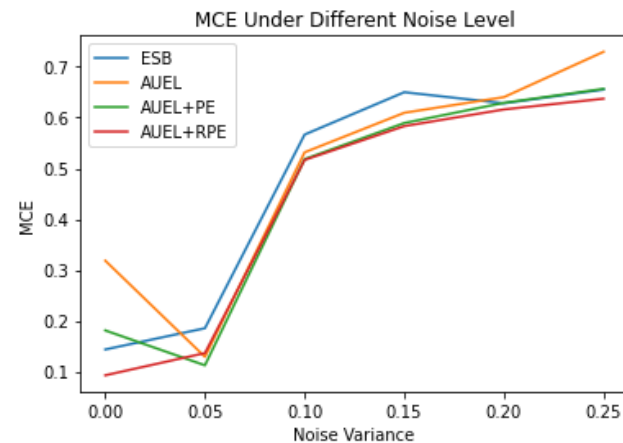

(e) MCE

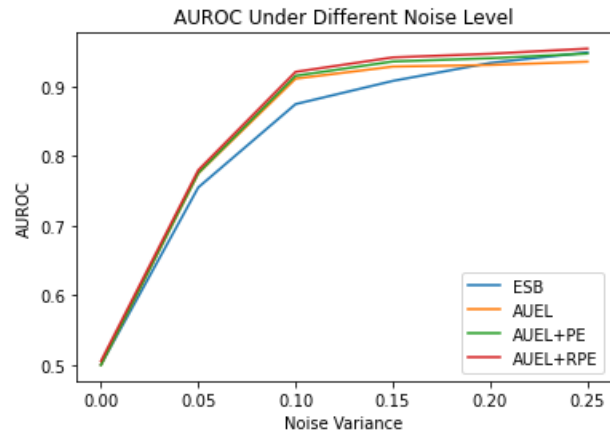

(f) AUROC

Supplement: supplementary_material [file attachment]

- ✕ Samples of the deep ensemble
- Samples of ours

$p(\theta|D)$

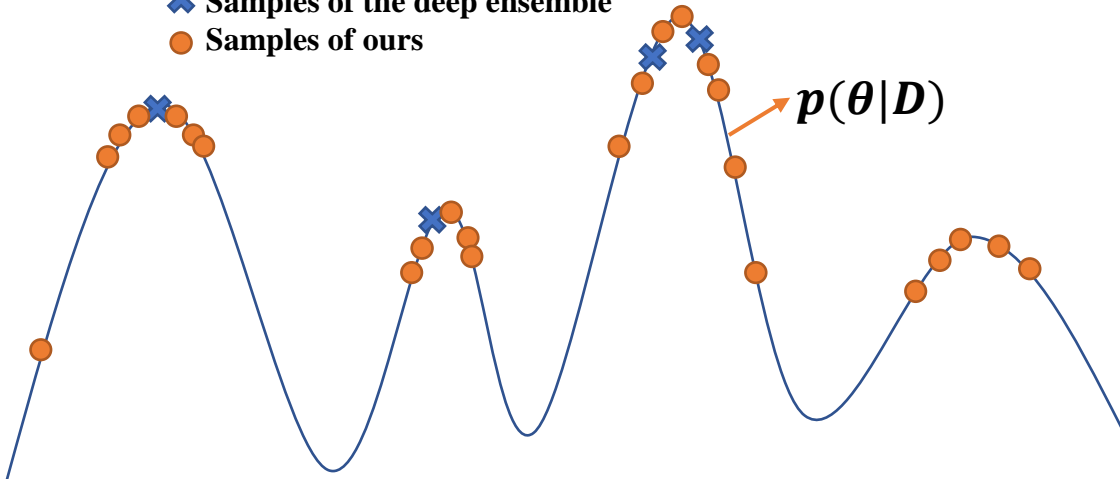

Supplement: supplementary_material [file attachment]

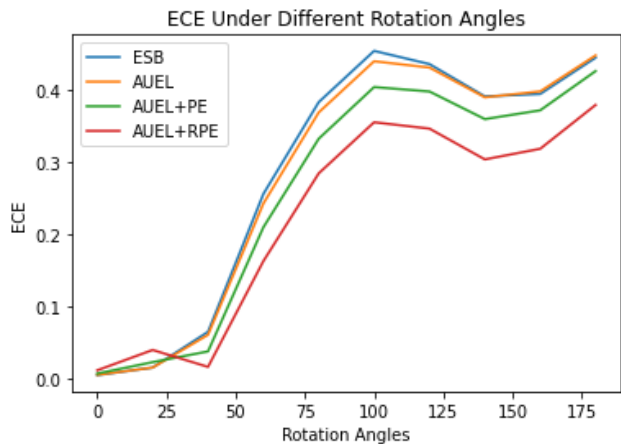

(a) ECE

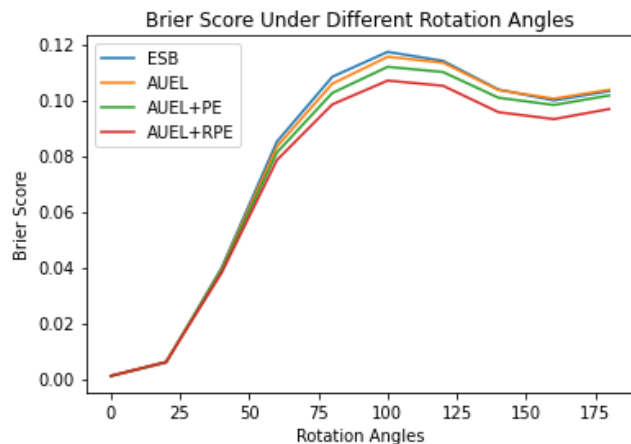

(b) Brier Score

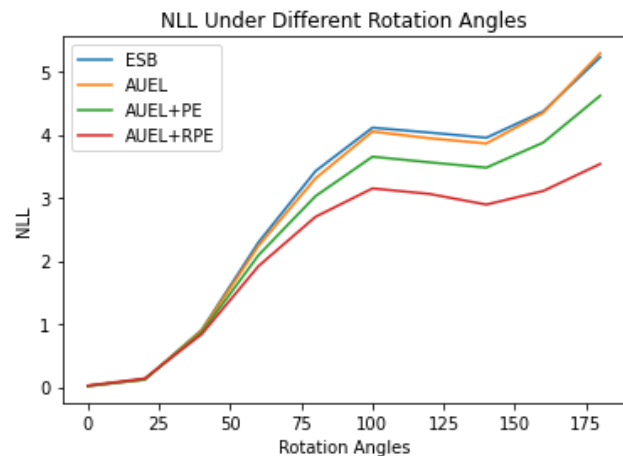

(c) NLL

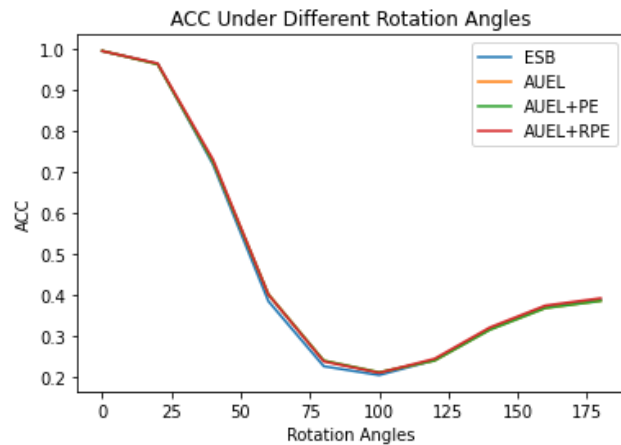

(d) ACC

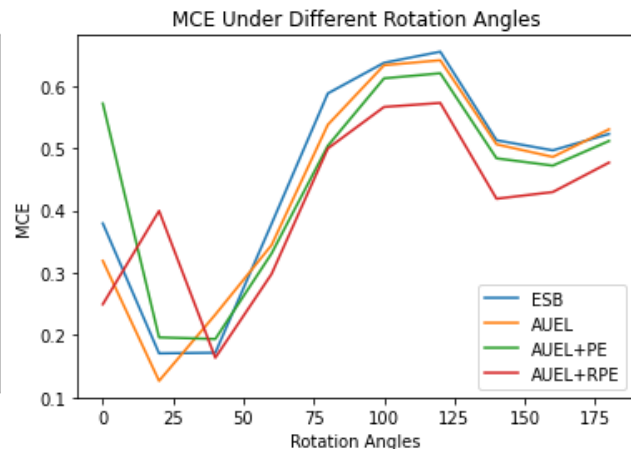

(e) MCE

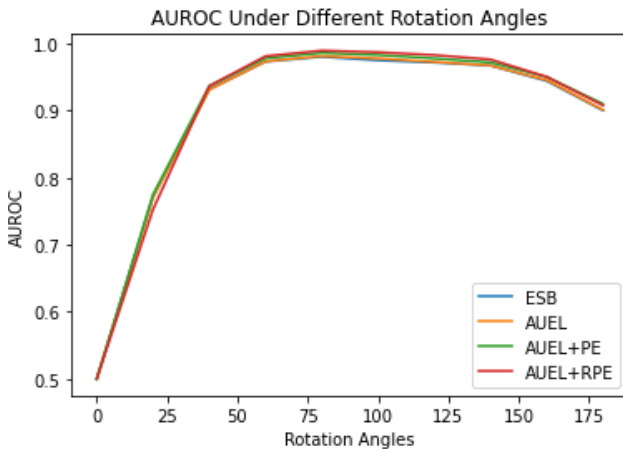

(f) AUROC

Supplement: supplementary_material [file attachment]
